# Supplementary material for: Evaluation of OAFlux datasets based on in situ air–sea flux tower observations over Yongxing Island in 2016
Source: Copernicus journal article supplement (doi:10.5194/amt-11-6091-2018), 2018-11-09
Supplement: Supplementary file 1 [file amt-11-6091-2018-supplement.zip]

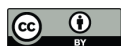

## *Supplement of*

# **Evaluation of OAFlux datasets based on in situ air–sea flux tower observations over Yongxing Island in 2016**

**Fenghua Zhou et al.**

*Correspondence to:* Dongxiao Wang ([dxwang@scsio.ac.cn](mailto:dxwang@scsio.ac.cn)) and Qiang Xie ([gordonxie@idsse.ac.cn](mailto:gordonxie@idsse.ac.cn))

- [amt-11-6091-2018-supplement-title-page.pdf](#)
- YXASFT DATA
  - 20160201-0229.xlsx
  - 20160301-0331.xlsx
  - 20160401-0430.xlsx
  - 20160501-0531.xlsx
  - 20160601-0630.xlsx
  - 20160701-0731.xlsx
  - 20160801-0831.xlsx
  - 20160901-0930.xlsx
  - 20161001-1031.xlsx
  - 20161101-1130.xlsx
  - 20161201-1231.xlsx
  - 20170101-0131.xlsx
  - HEADER.txt

The copyright of individual parts of the supplement might differ from the CC BY 4.0 License.
